# Supplementary material for: Jian-Pi-Yi-Shen Decoction Relieves Renal Anemia in 5/6 Nephrectomized Rats: Production of Erythropoietin via Hypoxia Inducible Factor Signaling
Source: Hindawi journal article supplement (doi:10.1155/2019/2807926), 2019-03-03
Supplement: f1 [file 2807926.f1.pdf]

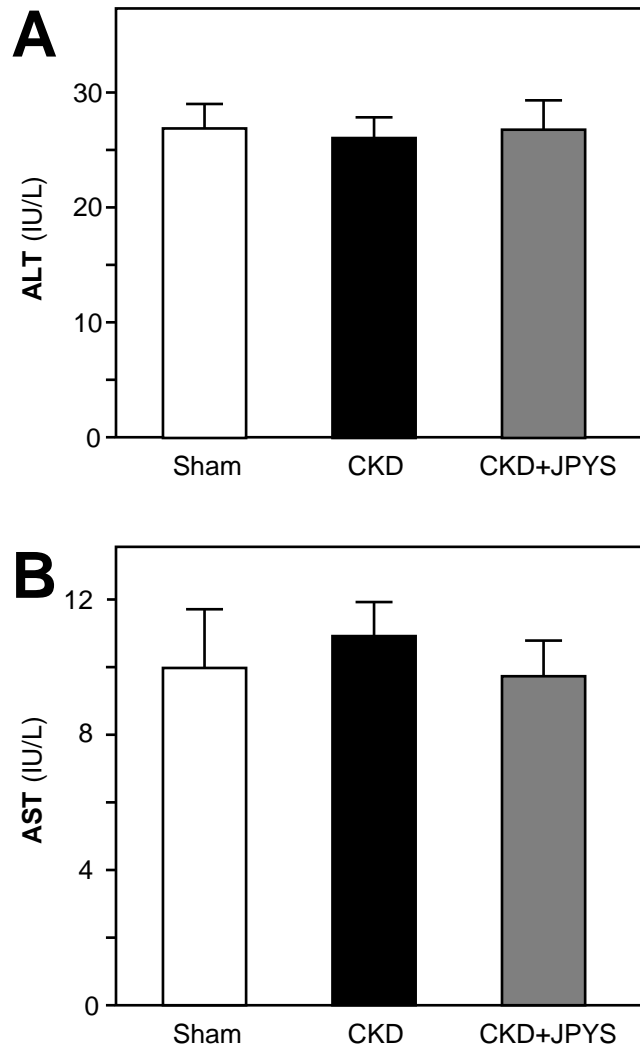

**Supplementary Figure 1. Effect of JPYS on liver function in CKD rats.**

The levels of ALT (**A**) and AST (**B**) were measured by ELISA. Data are expressed as the Mean  $\pm$  SEM, where n = 6 rats per group.
